# Supplementary material for: Charge density fluctuation determined the interlayer friction in bilayer MN4 (M = Be, Mg, and Pt)
Source: Royal Society of Chemistry journal article supplement (doi:10.1039/d4cp01290a), 2024-01-01
Supplement: d4cp01290a1.pdf [file d4cp01290a1.pdf]

## Supplemental Material: Charge density fluctuation determined

### interlayer friction in bilayer $MN_4$ ( $M = \text{Be}, \text{Mg}, \text{and Pt}$ )

Defeng Hou<sup>1</sup>, Ziyu Niu<sup>1</sup>, Xuhong Li<sup>1</sup>, Xixiang Jing<sup>1</sup>, Jing Sun<sup>1</sup>, Xiaoli Fan<sup>1,2</sup>,

Junqin Shi<sup>1,2</sup>, Tengfei Cao<sup>\*1,2</sup>

<sup>1</sup>Research Center for Advanced Lubrication and Sealing Materials, School of Materials Science and Engineering, Northwestern Polytechnical University, Xi'an, Shaanxi 710072, P.R. China.

<sup>2</sup>State Key Laboratory of Solidification Processing, Northwestern Polytechnical University, Xi'an, Shaanxi 710072, PR China.

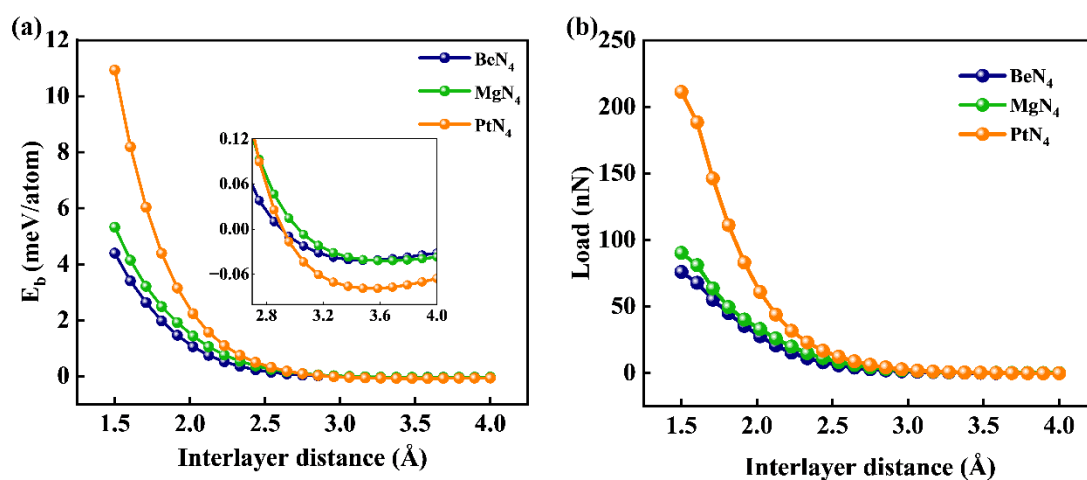

**Figure S1:** (a) The interlayer bonding energy of BeN<sub>4</sub>, MgN<sub>4</sub> and PtN<sub>4</sub> under different interlayer distance. (b) The normal load on the layer of BeN<sub>4</sub>, MgN<sub>4</sub> and PtN<sub>4</sub> under different interlayer distance.
